# Supplementary material for: Maternally Derived Antibodies to Foot-and-Mouth Disease Virus Modulate the Antigenic Specificity of Humoral Responses in Vaccinated Cattle
Source: MDPI journal article supplement (doi:10.3390/vaccines11121844), 2023-12-13
Supplement: s1 [file s1]

**Supplementary Table S1.** Final linear mixed model for homologous and heterologous log<sub>10</sub> virus neutralising titres against foot-and-mouth disease virus in calves following vaccination.

| coefficient  | homologous titres |       |         | heterologous titres |       |         |
|--------------|-------------------|-------|---------|---------------------|-------|---------|
|              | estimate          | s.e.* | p-value | estimate            | s.e.* | p-value |
| intercept    | 2.26              | 0.19  | <0.001  | 1.36                | 0.20  | <0.001  |
| age (months) |                   |       |         |                     |       |         |
| 2            | baseline          | -     | -       | baseline            | -     | -       |
| 3            | -0.71             | 0.24  | 0.006   | -0.55               | 0.26  | 0.04    |
| 4            | -0.45             | 0.26  | 0.09    | -0.55               | 0.28  | 0.04    |
| 5            | -0.50             | 0.35  | 0.17    | -0.90               | 0.36  | 0.02    |
| 6            | -1.61             | 0.24  | <0.001  | -0.77               | 0.25  | 0.003   |
| 7            | -1.55             | 0.23  | <0.001  | -0.65               | 0.25  | 0.01    |
| dpv          |                   |       |         |                     |       |         |
| 0            | baseline          | -     | -       | baseline            | -     | -       |
| 21           | -0.31             | 0.22  | 0.16    | 0.29                | 0.26  | 0.27    |
| 49           | -0.82             | 0.22  | <0.001  | 0.72                | 0.26  | 0.007   |
| boost        |                   |       |         |                     |       |         |
| no           | baseline          | -     | -       | baseline            | -     | -       |
| yes          | -0.64             | 0.25  | 0.02    | -0.30               | 0.25  | 0.24    |
| age:dpv†     |                   |       |         |                     |       |         |
| 3 - 21       | 0.49              | 0.27  | 0.07    | 0.66                | 0.33  | 0.05    |
| 4 - 21       | -0.14             | 0.31  | 0.66    | 0.26                | 0.38  | 0.49    |
| 5 - 21       | 0.42              | 0.31  | 0.17    | 0.86                | 0.37  | 0.02    |
| 6 - 21       | 1.04              | 0.26  | <0.001  | 1.10                | 0.31  | <0.001  |
| 7 - 21       | 1.09              | 0.26  | <0.001  | 0.42                | 0.32  | 0.19    |
| 3 - 49       | 0.79              | 0.27  | 0.004   | 0.11                | 0.33  | 0.74    |
| 4 - 49       | 0.09              | 0.31  | 0.76    | 0.15                | 0.38  | 0.68    |
| 5 - 49       | 0.76              | 0.31  | 0.02    | -0.03               | 0.37  | 0.94    |
| 6 - 49       | 1.31              | 0.26  | <0.001  | 0.08                | 0.31  | 0.79    |
| 7 - 49       | 1.24              | 0.26  | <0.001  | -0.32               | 0.32  | 0.32    |
| age:boost†   |                   |       |         |                     |       |         |
| 3 - yes      | 0.22              | 0.30  | 0.47    | 0.20                | 0.28  | 0.47    |
| 4 - yes      | 0.54              | 0.39  | 0.17    | 0.24                | 0.36  | 0.52    |
| 5 - yes      | -0.07             | 0.38  | 0.86    | 0.55                | 0.36  | 0.13    |
| 6 - yes      | 0.81              | 0.28  | 0.006   | 0.39                | 0.26  | 0.15    |
| 7 - yes      | 0.51              | 0.29  | 0.09    | 0.15                | 0.27  | 0.59    |
| boost:dpv†   |                   |       |         |                     |       |         |
| 21 - yes     | -0.10             | 0.15  | 0.51    | -0.17               | 0.19  | 0.35    |
| 49 - yes     | 1.02              | 0.15  | <0.008  | 0.71                | 0.19  | <0.001  |

\* s.e. - standard error

† interaction term
